# Supplementary material for: Prevalence and Genetic Diversity of Trueperella pyogenes Isolated from Infections in European Bison (Bison bonasus)
Source: MDPI journal article supplement (doi:10.3390/ani12141825), 2022-07-18
Supplement: s1 [file s1]

**Table S1.** The detailed characterization of European bison (*Bison bonasus*) from which *Trueperella pyogenes* was isolated in this study.

| Year of studying | Animal designation | Sex | Age        | Location* | Type of herd | Condition | Collected samples                                                   | <i>Trueperella pyogenes</i> isolate (from) |
|------------------|--------------------|-----|------------|-----------|--------------|-----------|---------------------------------------------------------------------|--------------------------------------------|
| 2011             | L555               | M   | 18 years   | BPF       | free-living  | dead**    | foreskin swab                                                       | 1/2011 (foreskin swab)                     |
|                  | 893/F              | F   | 5.5 years  | BPF       | free-living  | dead      | lung swab, vaginal swab, skin abscess swab, lymph node abscess swab | 2/2011 (skin abscess swab)                 |
|                  | 1/BPF              | M   | unknown    | BPF       | free-living  | dead      | foreskin swab                                                       | 3/2011 (foreskin swab)                     |
| 2012             | 2/BPF              | M   | unknown    | BPF       | free-living  | alive     | skin abscess swab                                                   | 4/2012 (skin abscess swab)                 |
|                  | 908                | F   | unknown    | BPF       | free-living  | dead      | salivary gland abscess swab                                         | 1_nt*** (salivary gland abscess swab)      |
|                  | 914                | M   | 6 years    | BPF       | free-living  | dead      | foreskin swab, tracheal abscess swab                                | 5/2012 (tracheal abscess swab)             |
|                  | „Plesar“           | M   | unknown    | P         | captive      | dead      | internal organs, lung abscess swab                                  | 6/2012 (lung abscess swab)                 |
|                  | 918                | M   | 2.5 years  | BPF       | free-living  | dead      | foreskin swab                                                       | 2_nt (foreskin swab)                       |
|                  | 919                | F   | 22 years   | BPF       | free-living  | dead      | lung swab, vaginal swab, tracheal swab                              | 7/2012 (tracheal swab)                     |
|                  | 920                | M   | 4-5 months | BPF       | free-living  | dead      | foreskin swab, lung swab                                            | 8/2012 (lung swab)                         |
|                  | 921                | F   | unknown    | BPF       | free-living  | dead      | vaginal swab, lung swab                                             | 9/2012 (vaginal swab)                      |
|                  | 922                | M   | 5 years    | BPF       | free-living  | dead      | foreskin swab, tracheal swab, urethral swab                         | 10/2013 (foreskin swab)                    |
|                  | 923                | F   | 6 years    | BPF       | free-living  | dead      | vaginal swab, cervical swab                                         | 11/2013 (vaginal swab)                     |
| 2013             | 925                | F   | 5-6 months | BPF       | free-living  | dead      | vaginal swab, hoof abscess swab                                     | 12/2013 (hoof abscess swab)                |
|                  | 926                | M   | 3 years    | BPF       | free-living  | dead      | foreskin swab, lymph node                                           | 13/2013 (foreskin swab)                    |
|                  | 927                | M   | 2.5 years  | BPF       | free-living  | dead      | foreskin swab                                                       | 14/2013 (foreskin swab)                    |
|                  | 932                | M   | unknown    | BPF       | free-living  | dead      | foreskin swab, lung swab                                            | 3_nt (foreskin swab)                       |
|                  | 935                | M   | unknown    | BPF       | free-living  | dead      | foreskin swab                                                       | 4_nt (foreskin swab)                       |
|                  | 1/BF               | M   | unknown    | BF        | free-living  | dead      | foreskin swab, lymph node, gut                                      | 5_nt (foreskin swab), 6_nt (lymph node)    |
|                  | 942/M              | M   | unknown    | BPF       | free-living  | dead      | foreskin swab, skin swab, skin slice, uterine contents              | 15/2014 (skin swab)                        |
| 2014             | 944/M              | M   | unknown    | BPF       | free-living  | dead      | foreskin swab                                                       | 16/2014 (foreskin swab)                    |

|      |        |   |             |     |             |       |                                                                                         |                                                  |
|------|--------|---|-------------|-----|-------------|-------|-----------------------------------------------------------------------------------------|--------------------------------------------------|
| 2018 | 945/M  | M | unknown     | BPF | free-living | dead  | foreskin swab                                                                           | 17/2014 (foreskin swab)                          |
|      | 947/F  | F | unknown     | BPF | free-living | dead  | liver, labia minora swab                                                                | 7_nt (liver)                                     |
|      | 1/KF   | F | unknown     | KF  | free-living | dead  | uterus pus                                                                              | 18/2018 (uterus pus)                             |
|      | 2/KF   | F | 2.5-3 years | KF  | free-living | alive | nasal swab, conjunctival swab, pus from a vagina                                        | 19/2018 (vaginal pus)                            |
|      | L-1302 | M | unknown     | KF  | free-living | alive | nasal swab, conjunctival swab, foreskin swab                                            | 8_nt (foreskin swab)                             |
|      | L-1304 | F | unknown     | KF  | free-living | alive | nasal swab, conjunctival swab, vaginal swab, vaginal mucus                              | 20/2018 (vaginal mucus)                          |
|      | L-1320 | F | unknown     | KF  | free-living | alive | nasal swab, conjunctival swab, vaginal swab                                             | 21/2018 (nasal swab)                             |
|      | L-1323 | F | unknown     | BF  | free-living | alive | nasal swab, conjunctival swab, vaginal swab                                             | 22/2018 (vaginal swab)                           |
|      | L-1324 | F | unknown     | BF  | free-living | alive | nasal swab, conjunctival swab, vaginal swab                                             | 9_nt (vaginal mucus)                             |
|      | L-986  | M | unknown     | BF  | free-living | alive | nasal swab, conjunctival swab, foreskin swab                                            | 10_nt (foreskin swab)                            |
|      | L-1331 | F | unknown     | KF  | free-living | alive | nasal swab, conjunctival swab, vaginal swab                                             | 23/2018 (vaginal swab)                           |
|      | L-1339 | M | unknown     | KF  | free-living | alive | nasal swab conjunctival swab, foreskin swab                                             | 24/2018 (foreskin swab)                          |
|      | L-1347 | M | unknown     | B   | captive     | alive | nasal swab, conjunctival swab, foreskin swab                                            | 11_nt (foreskin swab)                            |
|      | L-1358 | F | unknown     | P   | captive     | alive | nasal swab, conjunctival swab, vaginal swab                                             | 25/2018 (vaginal swab)                           |
|      | L-1372 | M | unknown     | U   | captive     | alive | nasal swab, conjunctival swab, foreskin swab                                            | 26/2018 (nasal swab),<br>27/2018 (foreskin swab) |
| 2019 | L-1536 | F | 15 years    | BPF | free-living | dead  | nasal swab, conjunctival swab, vaginal swab, lung pus, pleural fluid, pericardial fluid | 12_nt (pericardial fluid),<br>13_nt (lung pus)   |
|      | L-1556 | M | 12 years    | BPF | free-living | dead  | nasal swab, conjunctival swab, pleural fluid, foreskin swab                             | 28/2019 (foreskin swab)                          |
|      | KB792  | M | 1 year      | BM  | captive     | alive | nasal swab, conjunctival swab, foreskin swab                                            | 29/2019 (foreskin swab)                          |

|      |        |   |          |     |             |       |                                                                              |                                          |
|------|--------|---|----------|-----|-------------|-------|------------------------------------------------------------------------------|------------------------------------------|
|      | KB796  | M | 1 year   | BM  | captive     | alive | nasal swab, conjunctival swab, foreskin swab                                 | 30/2019 (foreskin swab)                  |
|      | KB797  | M | 1 year   | BM  | captive     | alive | nasal swab, conjunctival swab, foreskin swab                                 | 31/2019 (foreskin swab)                  |
|      | L-1570 | F | 19 years | BPF | free-living | dead  | nasal swab, conjunctival swab, vaginal swab, lung pus, tracheal abscess swab | 32/2019 (lung pus)                       |
| 2020 | L-1575 | F | 17 years | BPF | free-living | dead  | nasal swab, conjunctival swab, vaginal swab, lung pus, pericardial fluid     | 33/2020 (nasal swab), 34/2020 (lung pus) |
|      | L-1668 | F | unknown  | BPF | free-living | alive | nasal swab, conjunctival swab, vaginal swab                                  | 35/2020 (vaginal swab)                   |
|      | L-1669 | F | unknown  | BPF | free-living | alive | nasal swab, conjunctival swab, vaginal swab                                  | 36/2020 (nasal swab)                     |
|      | L-1672 | F | unknown  | BPF | free-living | alive | nasal swab, conjunctival swab, vaginal swab                                  | 37/2020 (vaginal swab)                   |
| 2021 | 18-201 | F | unknown  | BPF | free-living | dead  | internal organs, lung pus                                                    | 38/2021 (lung pus)                       |
|      | L-1758 | F | 8 years  | KF  | free-living | dead  | lung pus                                                                     | 39/2021 (lung pus)                       |

\*BPF – Białowieska Primeval Forest, KF – Knyszyńska Forest, BF – Borecka Forest, P – Pszczyna, U – Ustroń, B – Bałtów, BM – Bieszczady Mountains

\*\* - „dead” – selectively culled for health reasons

\*\*\*nt- an isolate not stored and not tested in the study
